# Supplementary material
Source: PubMed Central journal article supplement (PMC4526156)
Supplement: NIHMS710910-supplement-supplement_1.pdf [file NIHMS710910-supplement-supplement_1.pdf]

Appendix 1. Presenters and Facilitators\*

**Welcome:** David Michaels, PhD, MPH, Assistant Secretary of Labor for Occupational Safety and Health (OSHA), Washington, DC.

**Panel 1**

Regina Greer-Smith, MPH, FACHE, President and Healthcare Project Professional, Healthcare Research Associates, LLC, Chicago. Knitasha Washington, MHA, FACHE, Chapter President, National Association of Health Services Executives, Chicago. Synkeithia Holly (1199SEIU [Service Employees International Union]), Food and Nutrition Service, Washington, DC; Eola Byrd (1199SEIU, Environmental Service), Washington, DC; Kerry Eaton, Senior Vice President and Chief Operating Officer (COO), Sacred Heart Health System, Pensacola, Florida; Kate Henderson, MHA, VP, and COO, University Medical Center, Brackenridge, Texas; Martin Hatlie, JD, President, Partnership for Patient Safety, Chicago.

**Panel 2**

Jeffrey Brady, MD, MPH, Patient Safety Portfolio Lead, Center for Quality Improvement and Patient Safety, Agency for Healthcare Research and Quality (AHRQ), Rockville, MD; Jim Battles, PhD, Center for Quality Improvement and Patient Safety, AHRQ; David DeJoy, PhD, Professor of Health Promotion and Behavior Emeritus, University of Georgia College of Public Health, Atlanta.

**Panel 3**

Laura Chenven, MS; Danielle Copeland, Assistant Director, H-CAP, Baltimore; Carl D. Samuels (199SEIU [Service Employees International Union]), Green Initiatives Liaison, Montefiore Medical Center, New York City; Will Johnson (1199SEIU), Environmental Service Worker, Prince Georges Hospital, Cheverly MD; Clarence Smith (1199SEIU), Environmental Service Worker, Maryland General Hospital, Baltimore; Rodney Trammel (SEIU United Healthcare Workers West), Kaiser Los Angeles Medical Center; Deborah Berkowitz, OSHA Chief of Staff, Washington, DC; Clifford McDonald, MD, FACP, FSHEA, Senior Advisor, Division of Healthcare Quality Promotion, Centers for Disease Control and Prevention, Atlanta; Kathleen Fagan, MD, MPH.

**Panel 4**

Jason Ormsby, PhD, MBA, MSHA, Senior Vice President for Atlas Research and Assistant Professor, Health Systems Administration, Georgetown University School of Nursing and Health Studies, Washington, DC, Kathleen Curran, JD, Senior Director of Public Policy, Catholic Health Association of the United States (CHA), Washington, DC, Robin Hemphill, MD, MPH.

**Small-Group Discussion Groups**

Lyn Penniman, RN, MPH, Director, Office of Physical Hazards and Others, OSHA; Jennifer Lipkovitz-Eaton, MD, MPH, Clinical Program Manager, Occupational Health Strategic Healthcare Group, VHA, Washington, DC; Kathryn Reback, RN, MSN, JD, Program Analyst, AHRQ; Whitney Gray, PhD, Director of Building Science Services, MedStar Institute for Innovation, Washington, DC; Jennifer Bell, PhD, National Institute for Occupational Safety and Health (NIOSH), CDC, Atlanta; Scott Goodell (SEIU UHW-W and Joint Employer Education Fund), Program Director, EVS Green Careers Project, Los Angeles; Laura Chenven MS; Barbara Braun, PhD; Eileen Storey, MD, MPH; L. Clifford McDonald, MD; Jim Collins, PhD, Associate Director, Division of Safety Research, NIOSH; Joe Zaroni, PhD, Continuing Education and Outreach Director, Illinois Education and Research Center, University of Illinois at Chicago; Mary Matz, MSPH, CPE, CSPHP, VHA, National Program Director, Patient Care Ergonomics, Washington, DC; Daniel Merenstein, MD, Associate Professor of Family Medicine, Georgetown University School of Medicine; Avram Mack, MD, Professor of Clinical Psychiatry, Georgetown University School of Medicine, Jonathan Rosen, MS, CIH, Rosen and Associates, New York City.

\* Excluding authors' detailed information (see page 192).
